# Supplementary material for: Optimization of Photovoltaic Performance of Pb-Free Perovskite Solar Cells via Numerical Simulation
Source: MDPI journal article supplement (doi:10.3390/molecules28010224), 2022-12-27
Supplement: s1 [file s1]

## Supporting Information

# Optimization of Photovoltaic Performance of Pb-Free Perovskite Solar Cells via Numerical Simulation

Ali Alsalmé \*, Malak Faisal Altowairqi, Afnan Abdullah Alhamed and Rais Ahmad Khan

Department of Chemistry, College of Science, King Saud University,  
Riyadh 11451, Saudi Arabia

\* Correspondence: aalsalme@ksu.edu.sa

**Table S1.** Parameters used for numerical simulation [1-3].

| Parameters                                                            | FTO                    | SnO <sub>2</sub>       | MAGeI <sub>3</sub>   | Spiro-OMeTAD           |
|-----------------------------------------------------------------------|------------------------|------------------------|----------------------|------------------------|
| Thickness (nm)                                                        | 500 nm                 | 100 nm                 | 150-1000 nm          | 100-500 nm             |
| Band Gap (eV)                                                         | 3.4                    | 3.4                    | 1.9                  | 3.1                    |
| Electron affinity (eV)                                                | 4.4                    | 4.4                    | 3.5                  | 2.1                    |
| Dielectric permittivity                                               | 9                      | 9                      | 10                   | 3                      |
| CB effective density of states (1 cm <sup>-3</sup> )                  | 2.2 x 10 <sup>18</sup> | 2.2 x 10 <sup>18</sup> | 1 x 10 <sup>16</sup> | 2.2 x 10 <sup>18</sup> |
| VB effective density of states (1 cm <sup>-3</sup> )                  | 1.8 x 10 <sup>19</sup> | 1.8 x 10 <sup>19</sup> | 1 x 10 <sup>15</sup> | 1.8 x 10 <sup>19</sup> |
| Electron thermal velocity (cm S <sup>-1</sup> )                       | 1 x 10 <sup>7</sup>    | 1 x 10 <sup>7</sup>    | 1 x 10 <sup>7</sup>  | 1 x 10 <sup>7</sup>    |
| Hole thermal velocity (cm S <sup>-1</sup> )                           | 1 x 10 <sup>7</sup>    | 1 x 10 <sup>7</sup>    | 1 x 10 <sup>7</sup>  | 1 x 10 <sup>7</sup>    |
| Electron mobility (cm <sup>2</sup> VS <sup>-1</sup> )                 | 20                     | 20                     | 16.2                 | 2 x 10 <sup>-4</sup>   |
| Hole mobility (cm <sup>2</sup> VS <sup>-1</sup> )                     | 10                     | 10                     | 10.1                 | 2 x 10 <sup>-4</sup>   |
| Shallow uniform donor density N <sub>D</sub> (1 cm <sup>-3</sup> )    | 2 x 10 <sup>19</sup>   | 2 x 10 <sup>19</sup>   | 1 x 10 <sup>9</sup>  | 0                      |
| Shallow uniform acceptor density N <sub>A</sub> (1 cm <sup>-3</sup> ) | -                      | 0                      | 1 x 10 <sup>9</sup>  | 2 x 10 <sup>18</sup>   |

|                                              |                    |                    |                    |                    |
|----------------------------------------------|--------------------|--------------------|--------------------|--------------------|
| Defect density $N_t$ ( $1 \text{ cm}^{-3}$ ) | $1 \times 10^{15}$ | $1 \times 10^{15}$ | $1 \times 10^{14}$ | $1 \times 10^{15}$ |
|----------------------------------------------|--------------------|--------------------|--------------------|--------------------|

**Table S2.** Numerical parameters used for different ETL [2-6].

| Parameters                                                     | TiO <sub>2</sub>     | WS <sub>2</sub>    | ZnO                  | ZnOS                 | ZnSe                 | WO <sub>3</sub>       |
|----------------------------------------------------------------|----------------------|--------------------|----------------------|----------------------|----------------------|-----------------------|
| Thickness (nm)                                                 | 100 nm               | 100 nm             | 100 nm               | 100-500 nm           | 100 nm               | 100 nm                |
| Band Gap (eV)                                                  | 3.2                  | 1.8                | 3.2                  | 2.83                 | 2.7                  | 3                     |
| Electron affinity (eV)                                         | 4.2                  | 3.95               | 4.2                  | 3.6                  | 4.1                  | 4.1                   |
| Dielectric permittivity                                        | 10                   | 13.60              | 9                    | 9                    | 8.6                  | 5.76                  |
| CB effective density of states ( $1 \text{ cm}^{-3}$ )         | $2.2 \times 10^{18}$ | $1 \times 10^{18}$ | $3.7 \times 10^{18}$ | $2.2 \times 10^{18}$ | $2.2 \times 10^{18}$ | $1.96 \times 10^{19}$ |
| VB effective density of states ( $1 \text{ cm}^{-3}$ )         | $1.8 \times 10^{19}$ | $1 \times 10^{18}$ | $1.8 \times 10^{19}$ | $1.8 \times 10^{19}$ | $1.8 \times 10^{19}$ | $1.96 \times 10^{19}$ |
| Electron thermal velocity ( $\text{cm S}^{-1}$ )               | $1 \times 10^7$      | $1 \times 10^7$    | $1 \times 10^7$      | $1 \times 10^7$      | $1 \times 10^7$      | $1 \times 10^7$       |
| Hole thermal velocity ( $\text{cm S}^{-1}$ )                   | $1 \times 10^7$      | $1 \times 10^7$    | $1 \times 10^7$      | $1 \times 10^7$      | $1 \times 10^7$      | $1 \times 10^7$       |
| Electron mobility ( $\text{cm}^2 \text{VS}^{-1}$ )             | 100                  | 50                 | 100                  | 100                  | 110                  | 10                    |
| Hole mobility ( $\text{cm}^2 \text{VS}^{-1}$ )                 | 25                   | 50                 | 25                   | 25                   | 400                  | 10                    |
| Shallow uniform donor density $N_D$ ( $1 \text{ cm}^{-3}$ )    | $1 \times 10^{19}$   | $1 \times 10^{18}$ | $5 \times 10^{17}$   | $2 \times 10^{18}$   | $1 \times 10^{18}$   | $3.68 \times 10^{19}$ |
| Shallow uniform acceptor density $N_A$ ( $1 \text{ cm}^{-3}$ ) | 0                    | 0                  | 0                    | 0                    | 0                    | 0                     |
| Defect density $N_t$ ( $1 \text{ cm}^{-3}$ )                   | $1 \times 10^{15}$   | $1 \times 10^{15}$ | $1 \times 10^{15}$   | $1 \times 10^{15}$   | $1 \times 10^{15}$   | $1 \times 10^{15}$    |

**Table S3.** Numerical parameters used for different HTL [2-9].

| Parameters                                                            | P <sub>3</sub> HT      | Cu <sub>2</sub> O       | CuI                     | PTAA                   | SnS                     |
|-----------------------------------------------------------------------|------------------------|-------------------------|-------------------------|------------------------|-------------------------|
| Thickness (nm)                                                        | 100                    | 100                     | 100                     | 100                    | 100                     |
| Band Gap (eV)                                                         | 2                      | 2.17                    | 2.98                    | 2.95                   | 1.6                     |
| Electron affinity (eV)                                                | 3.2                    | 3.20                    | 2.1                     | 2.3                    | 4.1                     |
| Dielectric permittivity                                               | 3                      | 7.1                     | 6.5                     | 3.5                    | 13                      |
| CB effective density of states (1 cm <sup>-3</sup> )                  | 2.5 x 10 <sup>18</sup> | 2.02 x 10 <sup>17</sup> | 2.8 x 10 <sup>19</sup>  | 2.2 x 10 <sup>18</sup> | 1.18 x 10 <sup>18</sup> |
| VB effective density of states (1 cm <sup>-3</sup> )                  | 1.8 x 10 <sup>19</sup> | 1.0 x 10 <sup>19</sup>  | 1.0 x 10 <sup>19</sup>  | 1.8 x 10 <sup>19</sup> | 4.46 x 10 <sup>18</sup> |
| Electron thermal velocity (cm S <sup>-1</sup> )                       | 1 x 10 <sup>7</sup>    | 1 x 10 <sup>7</sup>     | 1 x 10 <sup>7</sup>     | 1 x 10 <sup>7</sup>    | 1 x 10 <sup>7</sup>     |
| Hole thermal velocity (cm S <sup>-1</sup> )                           | 1 x 10 <sup>7</sup>    | 1 x 10 <sup>7</sup>     | 1 x 10 <sup>7</sup>     | 1 x 10 <sup>7</sup>    | 1 x 10 <sup>7</sup>     |
| Electron mobility (cm <sup>2</sup> VS <sup>-1</sup> )                 | 1 x 10 <sup>-4</sup>   | 200                     | 1.69 x 10 <sup>-4</sup> | 1 x 10 <sup>-4</sup>   | 15                      |
| Hole mobility (cm <sup>2</sup> VS <sup>-1</sup> )                     | 1 x 10 <sup>-4</sup>   | 80                      | 1.69 x 10 <sup>-4</sup> | 1 x 10 <sup>-4</sup>   | 100                     |
| Shallow uniform donor density N <sub>D</sub> (1 cm <sup>-3</sup> )    | 2 x 10 <sup>18</sup>   | 2 x 10 <sup>18</sup>    | 0                       | 0                      | 0                       |
| Shallow uniform acceptor density N <sub>A</sub> (1 cm <sup>-3</sup> ) | 0                      | 0                       | 1 x 10 <sup>18</sup>    | 1 x 10 <sup>18</sup>   | 1.1 x 10 <sup>16</sup>  |
| Defect density N <sub>t</sub> (1 cm <sup>-3</sup> )                   | 1 x 10 <sup>14</sup>   | 1 x 10 <sup>14</sup>    | 1 x 10 <sup>15</sup>    | 1 x 10 <sup>15</sup>   | 1 x 10 <sup>15</sup>    |

**Table S4.** Photovoltaic parameters of FTO/SnO<sub>2</sub>(100 nm)/MAGeI<sub>3</sub>(150 nm)/spiro-OMeTAD(100 nm) at different temperatures (300-500 K).

| Thickness of<br>MAGeI <sub>3</sub> (nm) | Temperature<br>(K) | Thickness of<br>spiro-OMeTAD<br>(nm) | Thickness of<br>SnO <sub>2</sub><br>(nm) | Thickness<br>of FTO<br>(nm) | Voc (V) | Jsc<br>(mA/cm <sup>2</sup> ) | FF<br>(%) | PCE<br>(%) |
|-----------------------------------------|--------------------|--------------------------------------|------------------------------------------|-----------------------------|---------|------------------------------|-----------|------------|
| 150                                     | 300                | 100                                  | 100                                      | 500                         | 1.6052  | 8.114923                     | 80.94     | 10.54      |
| 150                                     | 325                | 100                                  | 100                                      | 500                         | 1.6341  | 8.114913                     | 81.85     | 10.85      |
| 150                                     | 350                | 100                                  | 100                                      | 500                         | 1.6655  | 8.115252                     | 82.84     | 11.20      |
| 150                                     | 375                | 100                                  | 100                                      | 500                         | 1.6896  | 8.116031                     | 83.67     | 11.47      |
| 150                                     | 400                | 100                                  | 100                                      | 500                         | 1.7063  | 8.116847                     | 84.31     | 11.68      |
| 150                                     | 425                | 100                                  | 100                                      | 500                         | 1.7173  | 8.117371                     | 84.68     | 11.80      |
| 150                                     | 450                | 100                                  | 100                                      | 500                         | 1.7248  | 8.117598                     | 84.73     | 11.86      |
| 150                                     | 475                | 100                                  | 100                                      | 500                         | 1.7300  | 8.117639                     | 84.48     | 11.86      |
| 150                                     | 500                | 100                                  | 100                                      | 500                         | 1.7335  | 8.117598                     | 84.06     | 11.83      |

**Table S5.** Photovoltaic parameters of FTO/SnO<sub>2</sub>(100 nm)/MAGeI<sub>3</sub>(150-1000 nm)/spiro-OMeTAD(100 nm) at temperature of 400 K.

| Thickness of<br>MAGeI <sub>3</sub> (nm) | Temperature (K) | Thickness of<br>spiro-<br>OMeTAD<br>(nm) | Thickness of<br>SnO <sub>2</sub> (nm) | Thickness<br>of FTO<br>(nm) | Voc (V) | Jsc<br>(mA/cm <sup>2</sup> ) | FF<br>(%) | PCE<br>(%) |
|-----------------------------------------|-----------------|------------------------------------------|---------------------------------------|-----------------------------|---------|------------------------------|-----------|------------|
| 150                                     | 400             | 100                                      | 100                                   | 500                         | 1.7063  | 8.116847                     | 84.31     | 11.68      |
| 250                                     | 400             | 100                                      | 100                                   | 500                         | 1.7198  | 10.903281                    | 82.65     | 15.50      |
| 350                                     | 400             | 100                                      | 100                                   | 500                         | 1.7262  | 12.645160                    | 81.65     | 17.82      |
| 450                                     | 400             | 100                                      | 100                                   | 500                         | 1.7292  | 13.775897                    | 80.87     | 19.26      |
| 550                                     | 400             | 100                                      | 100                                   | 500                         | 1.7304  | 14.537314                    | 80.16     | 20.16      |
| 700                                     | 400             | 100                                      | 100                                   | 500                         | 1.7304  | 15.274751                    | 79.15     | 20.92      |
| 850                                     | 400             | 100                                      | 100                                   | 500                         | 1.7292  | 15.735923                    | 78.17     | 21.27      |
| 1000                                    | 400             | 100                                      | 100                                   | 500                         | 1.7275  | 16.043349                    | 77.18     | 21.39      |

**Table S6.** Photovoltaic parameters of FTO/different ETL(100 nm)/MAGeI<sub>3</sub>(550 nm)/spiro-OMeTAD(100 nm) at temperature of 400 K.

| Thickness of MAGeI <sub>3</sub> (nm) | Temperature (K) | Thickness of spiro-OMeTAD (nm) | ETL (thickness=100 nm) | Thickness of FTO (nm) | Voc (V) | Jsc (mA/cm <sup>2</sup> ) | FF (%) | PCE (%) |
|--------------------------------------|-----------------|--------------------------------|------------------------|-----------------------|---------|---------------------------|--------|---------|
| 550                                  | 400             | 100                            | SnO <sub>2</sub>       | 500                   | 1.7304  | 14.537314                 | 80.16  | 20.16   |
| 550                                  | 400             | 100                            | TiO <sub>2</sub>       | 500                   | 1.7707  | 14.621755                 | 82.14  | 21.27   |
| 550                                  | 400             | 100                            | ZnO                    | 500                   | 1.7700  | 14.637237                 | 81.49  | 21.11   |
| 550                                  | 400             | 100                            | ZnOS                   | 500                   | 1.7725  | 14.514284                 | 84.05  | 21.62   |
| 550                                  | 400             | 100                            | ZnSe                   | 500                   | 1.7704  | 14.576617                 | 81.78  | 21.10   |
| 550                                  | 400             | 100                            | WO <sub>3</sub>        | 500                   | 1.5122  | 14.570763                 | 77.19  | 17.01   |
| 550                                  | 400             | 100                            | WS <sub>2</sub>        | 500                   | 1.5700  | 10.349160                 | 48.13  | 7.82    |

**Table S7.** Photovoltaic parameters of FTO/ZnOS(100 nm)/MAGeI<sub>3</sub>(550 nm)/different HTL(100 nm) at temperature of 400 K.

| Thickness of MAGeI <sub>3</sub> (nm) | Temperature (K) | HTM (thickness=100 nm) | Thickness of ZnOS (nm) | Thickness of FTO (nm) | Voc (V) | Jsc (mA/cm <sup>2</sup> ) | FF (%) | PCE (%) |
|--------------------------------------|-----------------|------------------------|------------------------|-----------------------|---------|---------------------------|--------|---------|
| 550                                  | 400             | Spiro-OMeTAD           | 100                    | 500                   | 1.7725  | 14.514284                 | 84.05  | 21.62   |
| 550                                  | 400             | Cu <sub>2</sub> O      | 100                    | 500                   | 1.3017  | 11.724010                 | 86.50  | 13.20   |
| 550                                  | 400             | P <sub>3</sub> HT      | 100                    | 500                   | 1.5006  | 14.534840                 | 82.88  | 18.08   |
| 550                                  | 400             | CuI                    | 100                    | 500                   | 1.3926  | 14.513732                 | 80.92  | 16.36   |
| 550                                  | 400             | PTAA                   | 100                    | 500                   | 1.5468  | 14.513927                 | 82.22  | 18.46   |
| 550                                  | 400             | SnS                    | 100                    | 500                   | 0.8890  | 14.411546                 | 79.57  | 10.19   |

**Table S8.** Photovoltaic parameters of the FTO/ZnOS(100-500 nm)/MAGeI<sub>3</sub>(550 nm)/spiro-OMeTAD(100 nm) at temperature of 400 K.

| Thickness of MAGeI <sub>3</sub> (nm) | Temperature (K) | Thickness of Spiro-OMeTAD (nm) | Thickness of ZnOS (nm) | Thickness of FTO (nm) | Voc (V) | Jsc (mA/cm <sup>2</sup> ) | FF (%) | PCE (%) |
|--------------------------------------|-----------------|--------------------------------|------------------------|-----------------------|---------|---------------------------|--------|---------|
| 550                                  | 400             | 100                            | 100                    | 500                   | 1.7725  | 14.514284                 | 84.05  | 21.62   |
| 550                                  | 400             | 100                            | 200                    | 500                   | 1.7464  | 14.437178                 | 84.24  | 21.24   |
| 550                                  | 400             | 100                            | 300                    | 500                   | 1.7462  | 14.373313                 | 84.25  | 21.14   |
| 550                                  | 400             | 100                            | 400                    | 500                   | 1.7459  | 14.315627                 | 84.25  | 21.06   |
| 550                                  | 400             | 100                            | 500                    | 500                   | 1.7457  | 14.261470                 | 84.26  | 20.98   |

**Table S9.** Photovoltaic parameters of the FTO/ZnOS(100 nm)/MAGeI<sub>3</sub>(550 nm)/spiro-OMeTAD(100-500 nm) at temperature of 400 K.

| Thickness of MAGeI <sub>3</sub> (nm) | Temperature (K) | Thickness of Spiro-OMeTAD (nm) | Thickness of ZnOS (nm) | Thickness of FTO (nm) | Voc (V) | Jsc (mA/cm <sup>2</sup> ) | FF (%) | PCE (%) |
|--------------------------------------|-----------------|--------------------------------|------------------------|-----------------------|---------|---------------------------|--------|---------|
| 550                                  | 400             | 100                            | 100                    | 500                   | 1.7725  | 14.514284                 | 84.05  | 21.62   |
| 550                                  | 400             | 200                            | 100                    | 500                   | 1.7468  | 14.514171                 | 84.01  | 21.33   |
| 550                                  | 400             | 300                            | 100                    | 500                   | 1.7468  | 14.514167                 | 83.99  | 21.30   |
| 550                                  | 400             | 400                            | 100                    | 500                   | 1.7468  | 14.514163                 | 83.93  | 21.28   |
| 550                                  | 400             | 500                            | 100                    | 500                   | 1.7468  | 14.514159                 | 83.82  | 21.25   |

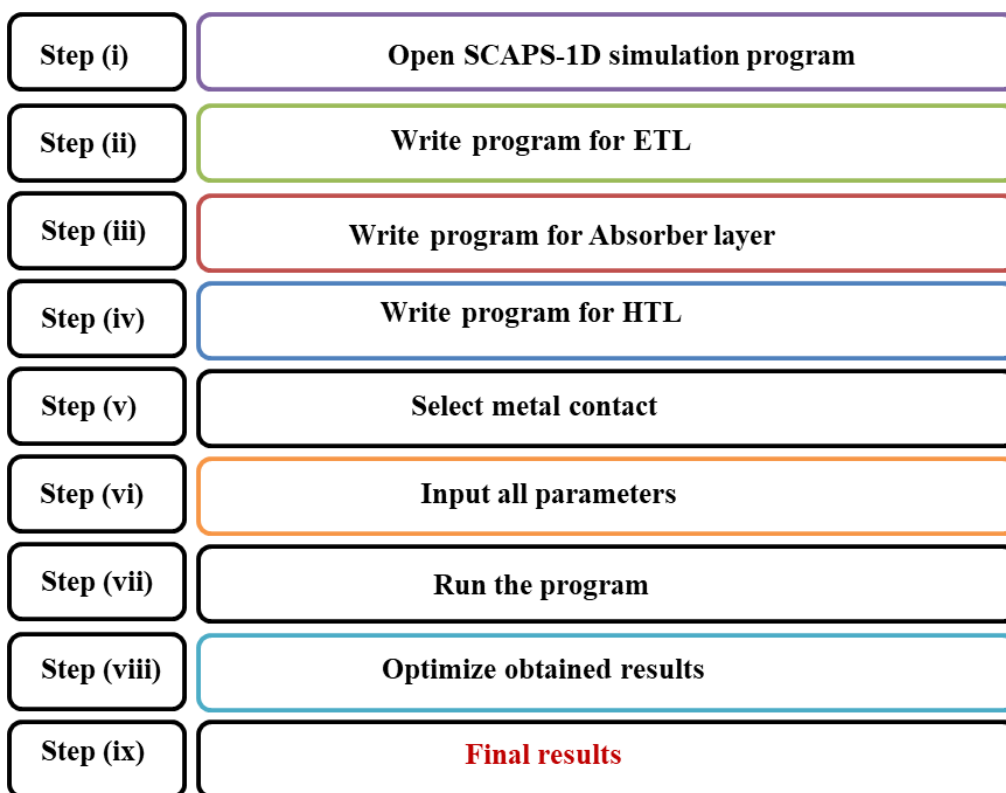

**Figure S1.** Flow chart for the simulation of PSCs on SCAP-1D.

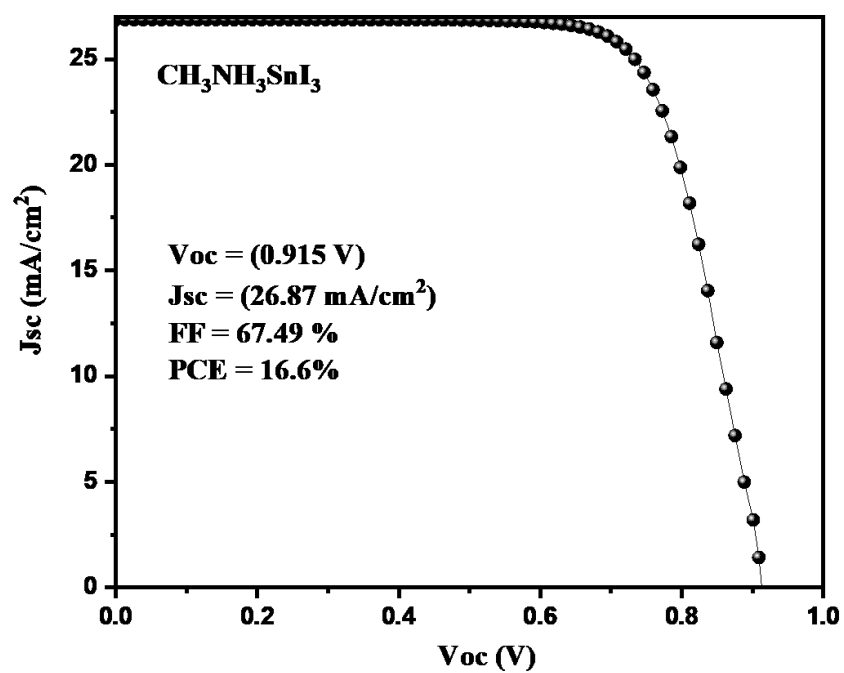

**Figure S2.** J-V curve for the simulated reference device [10].

## References

- [1] A. Tara, V. Bharti, S. Sharma, R. Gupta, Device simulation of  $\text{FASnI}_3$  based perovskite solar cell with  $\text{Zn}(\text{O}_{0.3}, \text{S}_{0.7})$  as electron transport layer using SCAPS-1D, Opt Mater. 119 (2021) 111362.
- [2] M.A. Rahman, Design and simulation of a high-performance Cd-free  $\text{Cu}_2\text{SnSe}_3$  solar cells with SnS electron-blocking hole transport layer and  $\text{TiO}_2$  electron transport layer by SCAPS-1D. SN Appl. Sci. 3, (2021) 253.
- [3] N. Lakhdar, A. Hima, Electron transport material effect on performance of perovskite solar cells based on  $\text{CH}_3\text{NH}_3\text{GeI}_3$ , Opt. Mater. 99 (2020) 109517.
- [4] Y. Raoui, H. Ez-Zahraouy, S. Ahmad, S. Kazim, Unravelling the theoretical window to fabricate high performance inorganic perovskite solar cells, Sustainable Energy Fuels, 5 (2021) 219–229.
- [5] M. K. Otoufi, M. Ranjbar, A. Kermanpur, N. Taghavinia, M. Minbashi, M. Forouzandeh, F. Ebadi, Enhanced performance of planar perovskite solar cells using  $\text{TiO}_2/\text{SnO}_2$  and  $\text{TiO}_2/\text{WO}_3$  bilayer structures: Roles of the interfacial layers, Sol. Energ. 208 (2020) 697-707.
- [6] N. Singh, A. Agarwal, M. Agarwal, Performance evaluation of lead-free double-perovskite solar cell, Opt. Mater. 114 (2021) 110964.
- [7] A. Mohandes, M. Moradi, H. Nadgaran, Numerical simulation of inorganic  $\text{Cs}_2\text{AgBiBr}_6$  as a lead-free perovskite using device simulation SCAPS-1D. Opt. Quant. Electron. 53 (2021) 319.



- [8] S. Z. Haider, H. Anwar. M. Wang, A comprehensive device modelling of perovskite solar cell with inorganic copper iodide as hole transport material, *Semicond. Sci. Technol.* 33 (2018) 035001.
- [9] M.I. Hossain, F.H. Alharbi, N. Tabet, Copper oxide as inorganic hole transport material for lead halide perovskite based solar cells, *Sol. Energy* 120 (2015) 370–380.
- [10] A.K. Singh, S. Srivastava, A. Mahapatra, J.K. Baral, B.Pradhan, Performance optimization of lead free-MASnI<sub>3</sub> based solar cell with 27% efficiency by numerical simulation, *Optical Materials*, 117 (2021) 111193.
